# Supplementary material
Source: publisher site journal article supplement (https://www.dovepress.com/article/400823)
Supplement: Supplementary file 1 [file get_supplementary_file.php]

**Supplementary material 1**

**Students' feedback on teaching light-curing by**

**instructional video vs. verbal instructions**

Please provide feedback on your opinion on the light-curing instructional method you performed

1. Gender
   - Male
   - Female
2. Assigned serial number
   - _____________
3. Instructional method group
   - Instructional video
   - Verbal instructions
4. Rate your level of light curing experience (5 is the highest and done a lot, 1 represents minimal experience light curing restorations in patients)
   - 1
   - 2
   - 3
   - 4
   - 5

**Satisfaction with past learning**

Please indicate your own personal feelings about each statement below by marking the numbers that best describe your attitude or beliefs. Please be truthful and describe your attitude as it really is, not what you would like for it to be.

Mark:
1 = STRONGLY DISAGREE with the statement
2 = DISAGREE with the statement
3 = UNDECIDED - you neither agree or disagree with the statement
4 = AGREE with the statement
5 = STRONGLY AGREE with the statement

1. The teaching method used when teaching me about light curing were helpful and effective.
   - 1
   - 2
   - 3
   - 4
   - 5
2. The teaching method provided me with a variety of learning materials and activities to promote my learning of the Dental curriculum.
   - 1
   - 2
   - 3
   - 4
   - 5
3. I enjoyed the instructional method used to teach me how to light cure correctly.
   - 1
   - 2
   - 3
   - 4
   - 5
4. The teaching materials used (light-curing unit and patient simulator) to teach me how to light cure correctly were motivating and helped me to learn.
   - 1
   - 2
   - 3
   - 4
   - 5
5. The teaching method used to teach me how to light cure correctly was suitable to the way I learn.
   - 1
   - 2
   - 3
   - 4
   - 5

**Self-confidence in learning**

Please indicate your own personal feelings about each statement below by marking the numbers that best describe your attitude or beliefs. Please be truthful and describe your attitude as it really is, not what you would like for it to be.

Mark:
1 = STRONGLY DISAGREE with the statement
2 = DISAGREE with the statement
3 = UNDECIDED - you neither agree or disagree with the statement
4 = AGREE with the statement
5 = STRONGLY AGREE with the statement

1. My instructors used helpful resources to teach me how to light cure correctly.
   - 1
   - 2
   - 3
   - 4
   - 5
2. My instructors gave me useful feedback after the exercise about how to light cure correctly.
   - 1
   - 2
   - 3
   - 4
   - 5
3. I know how and where to get help when I do not understand the concepts covered when teaching me how to light cure correctly.
   - 1
   - 2
   - 3
   - 4
   - 5
4. I am comfortable using simulation activities to learn critical aspects of light curing.
   - 1
   - 2
   - 3
   - 4
   - 5
5. I am confident that I have developed the skills and obtained the required knowledge how to correctly light cure a restoration in a clinical setting.
   - 1
   - 2
   - 3
   - 4
   - 5
6. I am confident that I have mastered the content that my instructors taught me when I was taught to light cure correctly.
   - 1
   - 2
   - 3
   - 4
   - 5
7. I think that the light curing instructions that I received covered critical content necessary for me to master how to light cure a restoration.
   - 1
   - 2
   - 3
   - 4
   - 5
8. I remember what I was taught two years ago, and I used the skills that I learned when I am light curing restorations.
   - 1
   - 2
   - 3
   - 4
   - 5

**Knowledge section**

Please answer these three knowledge questions about light curing:

1. What wavelength range do most curing lights deliver? *

- 400 to 500 m
- 400 to 500 nm
- 400 to 500 mW/cm2
- 500 to 600 nm
- 1000 to 1500 mW/cm2

1. To deliver 20 J/cm2 in 10 s, what irradiance must the curing light deliver? *

- 1,000 J/cm2
- 1,000 mW/cm2
- 2,000 J/cm2
- 2,000 mW/cm2
- 20,000 mW/cm2

1. What part of the human body is thought to be most adversely affected by blue light? *

- Oral Mucosa
- Enamel
- Dentin
- Tongue
- Retina

**Sources for obtaining light curing information section**

1. Have you been exposed to any educational material regarding light curing in the past two years other than the lecture taken in your fifth-year curriculum?

- Yes
- No

1. If your answer was yes, what was the method of education? Please select all that apply.

 Books

 Lecture (online or in person)

 Scientific articles

 Conferences

 Workshop

 Social media

 Other

1. If you have been exposed to other methods of education regarding light curing what was the method of education?
   - ________________________________________________________________________________________________________________________________________________________________________________________________

**Open-ended section**

- What comments do you have about your experience?

______________________________________________________________________________________________________________________________________________________________________________________________________________

Thank you for your participation.

**Supplementary material 2**

**Examiners' feedback on the students' light-curing performance**

**(Instructional video vs. verbal instructions)**

Please provide feedback on your opinion on the students’ light-curing performance

1. Examiner
   - Examiner 1
   - Examiner 2
2. Based on your observation, which teaching method improved the students' light-curing performance?
   - Instructional video
   - Verbal instructions
3. Why did you select your answer? Please add your comments
   - ________________________________________________________________________________________________________________________________________________________________________________________________
4. What were the students' verbal comments on each teaching method?
   - ________________________________________________________________________________________________________________________________________________________________________________________________

Thank you for your feedback.
